# Supplementary material for: Preparation of titanate nanosheets and nanoribbons by exfoliation of amine intercalated titanates
Source: Royal Society of Chemistry journal article supplement (doi:10.1039/c6cp01624c), 2016-01-01
Supplement: c6cp01624c1.pdf [file c6cp01624c1.pdf]

## Titanate nanosheets and nanoribbons by exfoliation of amine intercalated titanates

A. Anto Jeffery, A. Pradeep and Michael Rajamathi\*

### Electronic Supplementary Information

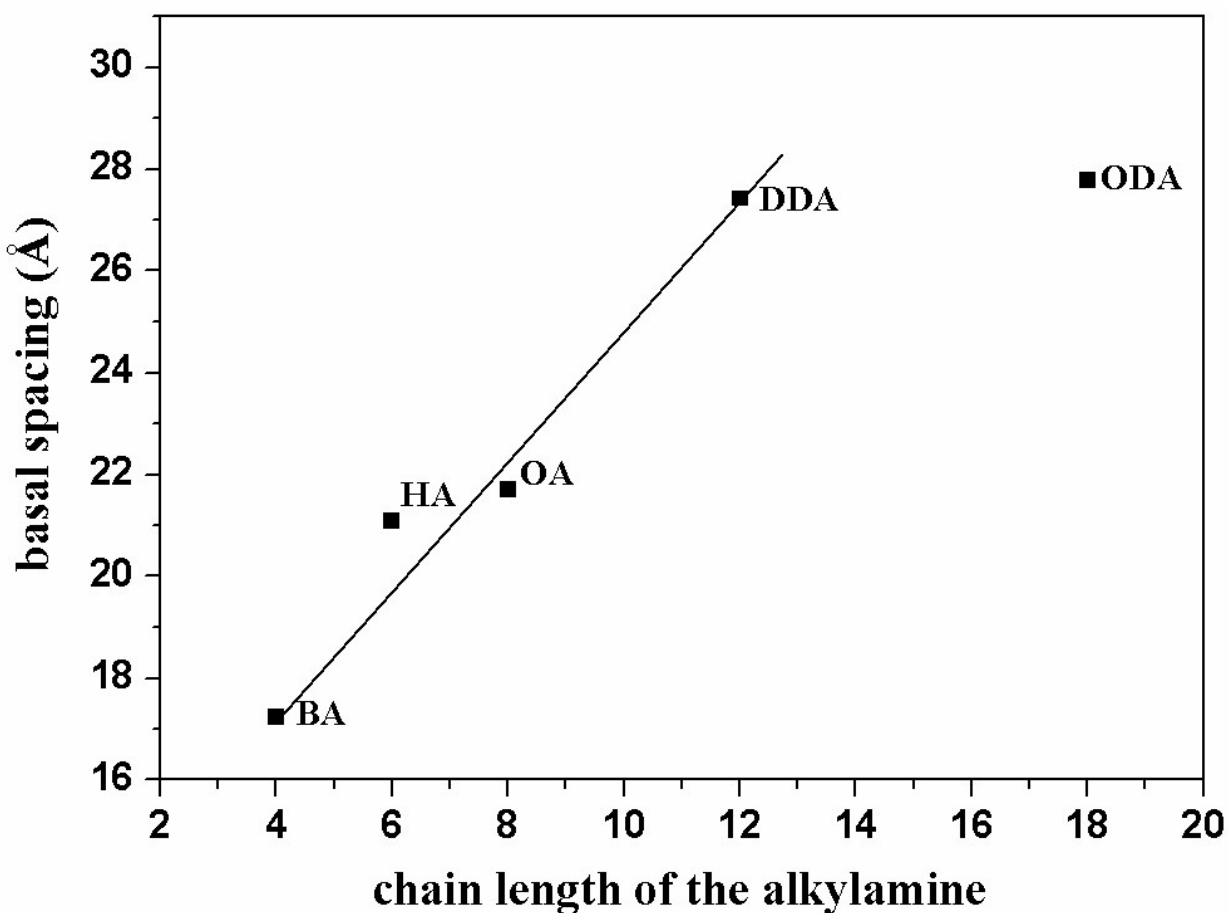

**Figure S1.** Variation of basal spacing of amine–titanate with the number of carbon atoms in the alkyl chain of the intercalated amine.

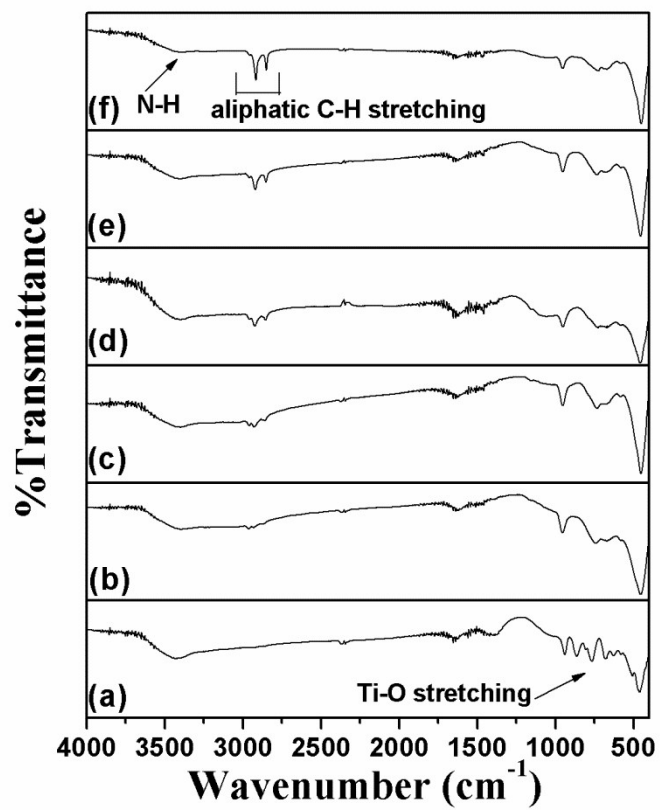

**Figure S2.** IR spectra of (a) potassium titanate, (b) n-BA/titanate, (c) n-HA/titanate, (d) n-OA/titanate, (e) n-DDA/titanate, (f) n-ODA/titanate.

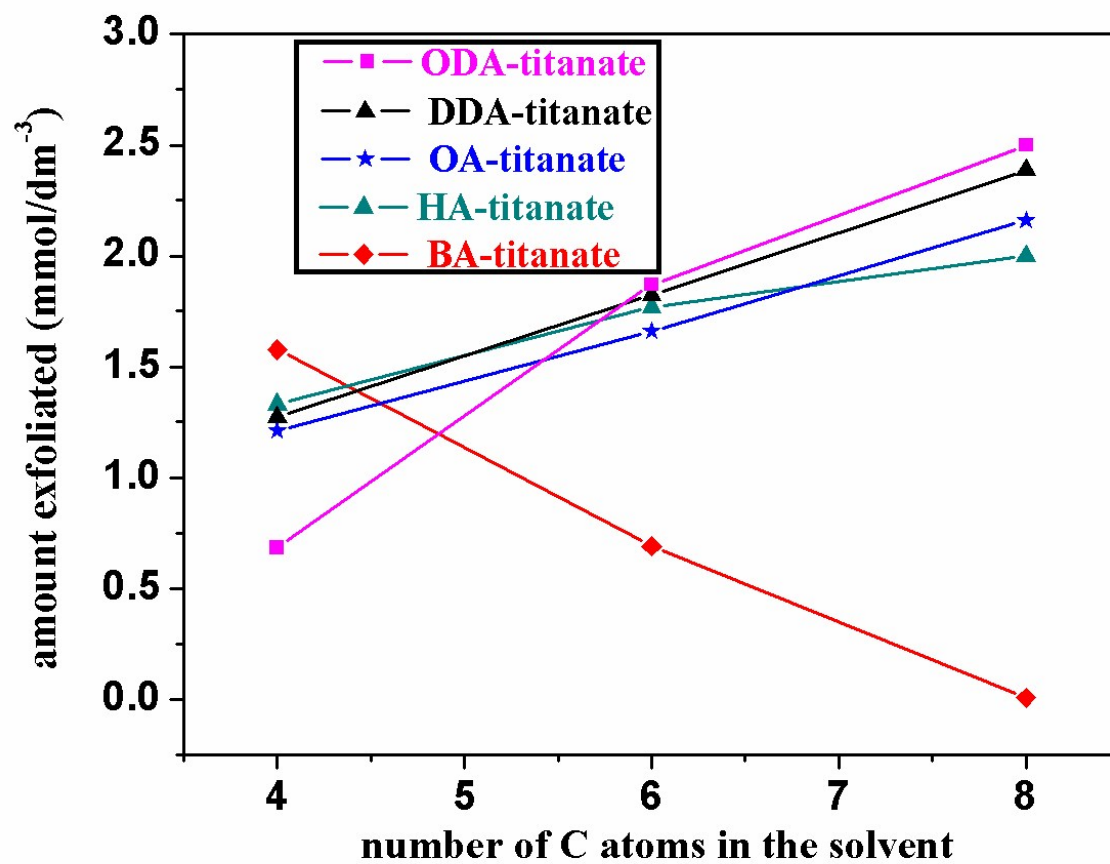

**Figure S3.** Variation of the amount of amine-titanate exfoliated in alcohol with the carbon chain length of the alcohol.

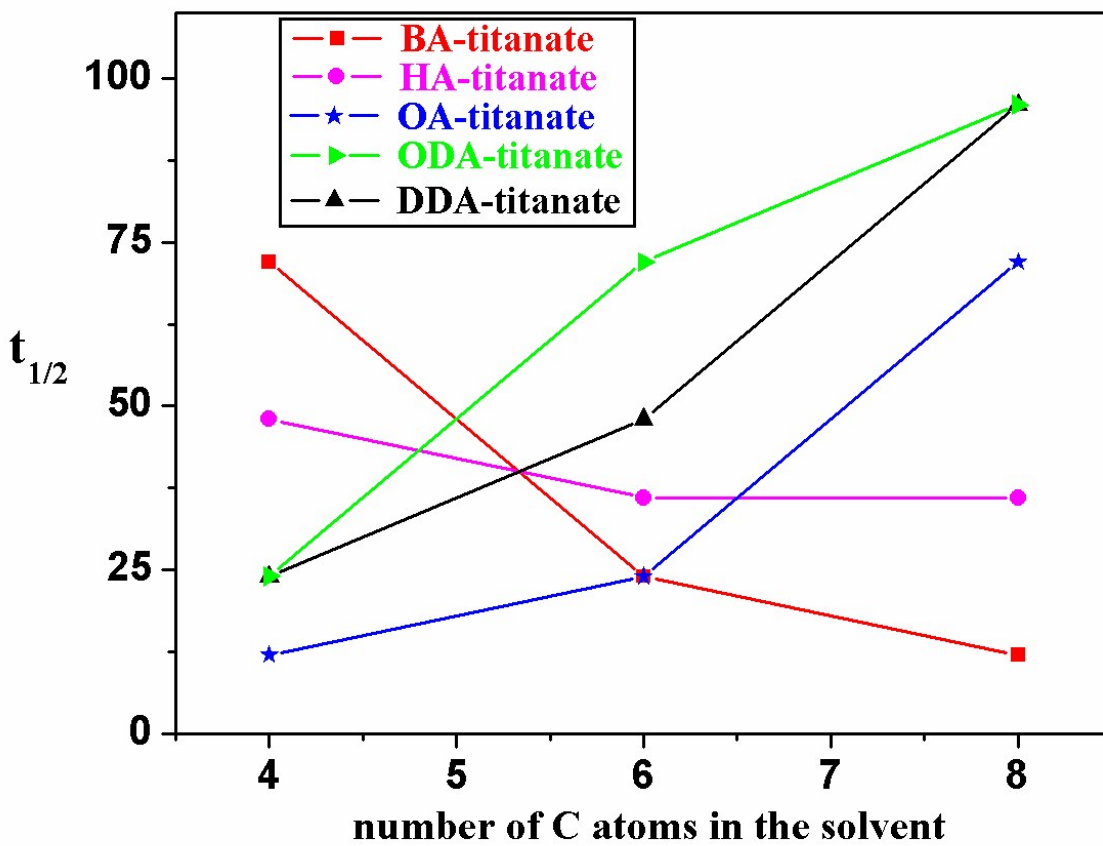

**Figure S4.** Variation of  $t_{1/2}$  of the colloidal dispersion of amine-titanate in alcohol with the carbon chain length of the alcohol.
